# Supplementary material
Source: PubMed Central journal article supplement (PMC4838497)
Supplement: NIHMS772060-supplement-2.pdf [file NIHMS772060-supplement-2.pdf]

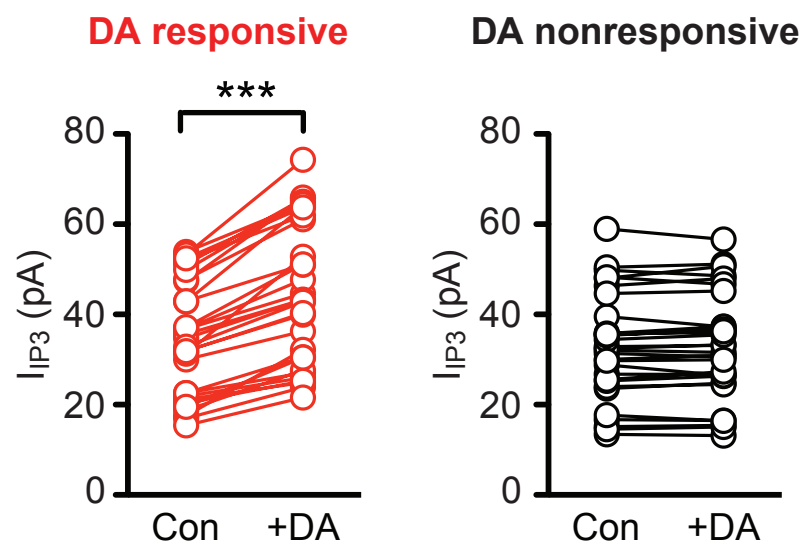

**Figure S1 (related to Figure 1).** Graphs plotting I<sub>IP3</sub> amplitude in control and with preceding DA application in two subpopulations of MSNs illustrated in Figure 1C.

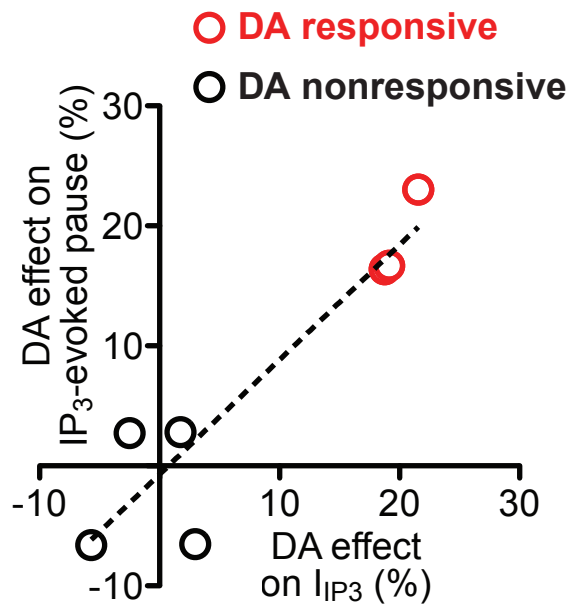

**Figure S2 (related to Figure 2).** The magnitude of DA effect on  $I_{IP3}$ -evoked firing pauses assessed in current clamp is plotted versus the magnitude of DA effect on  $I_{IP3}$  measured in voltage clamp in individual MSNs. Dashed line is a linear fit to all data points ( $r = 0.92$ ,  $p < 0.01$ ; Pearson correlation).

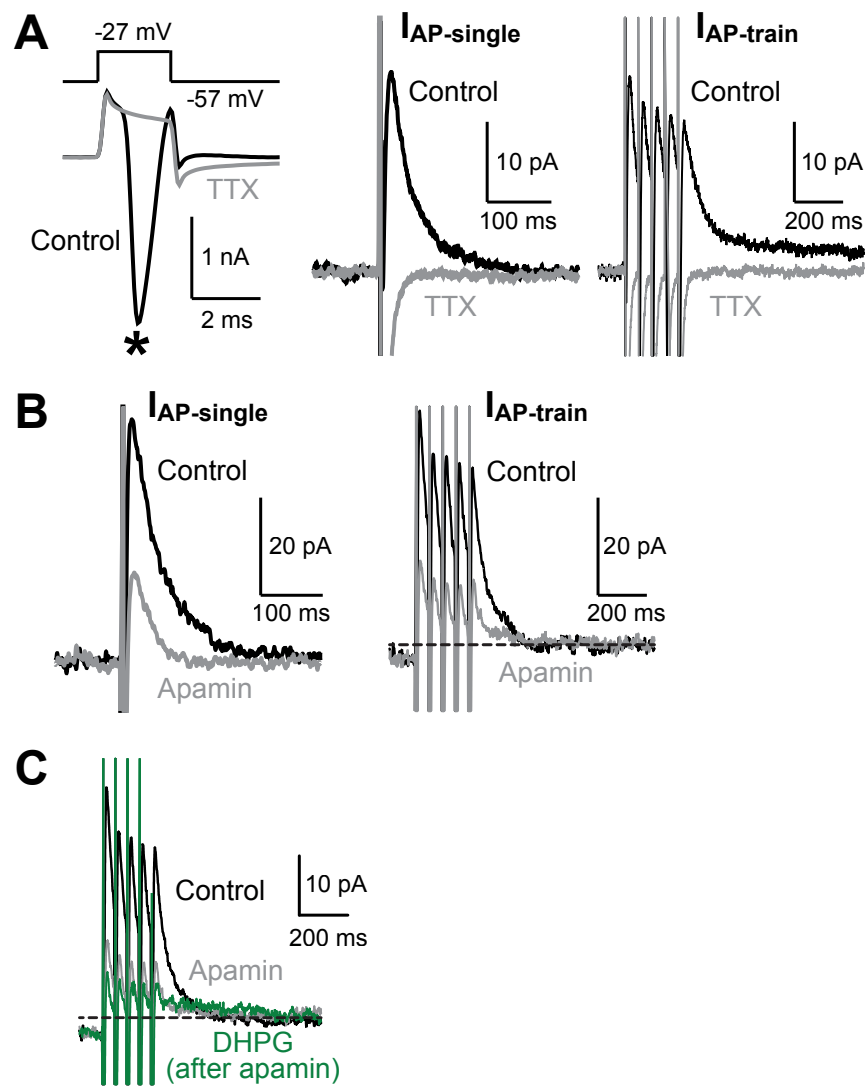

**Figure S3 (related to Figure 3).** (A) Example traces showing that TTX (1  $\mu$ M), which blocked the unclamped AP-dependent transient inward current (asterisk in the left trace) during the 2 ms depolarization, abolished  $I_{AP-single}$  and  $I_{AP-train}$ . (B) Example traces depicting the effect of apamin (100 nM) on  $I_{AP-single}$  and  $I_{AP-train}$ . (C) Representative traces showing that DHPG failed to affect  $I_{AP-train}$  after apamine treatment.

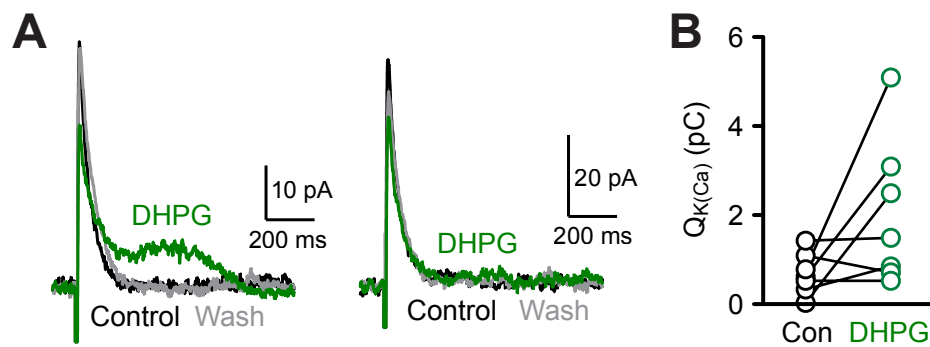

**Figure S4 (related to Figure 3).** (A) Example traces illustrating the effect of DHPG (5  $\mu$ M) on  $I_{AP-single}$  in two MSNs. Note that DHPG facilitated  $I_{AP-single}$  in one cell (left), while having no effect in the other cell (right). (B) Summary graph showing DHPG effect on  $Q_{K(Ca)}$  for

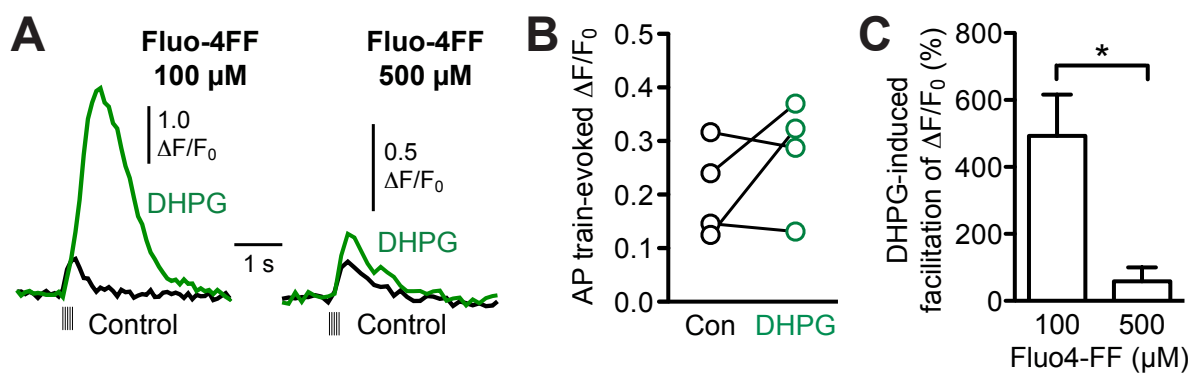

**Figure S5 (related to Figure 3).** (A) Example traces illustrating DHPG-induced facilitation of AP train-evoked  $\text{Ca}^{2+}$  transients monitored with 100  $\mu\text{M}$  Fluo-4FF (left; from the same cell shown in Figure 4B) or 500  $\mu\text{M}$  Fluo-4FF (right). (B) Plot of AP train-evoked  $\text{Ca}^{2+}$  transients (monitored with 500  $\mu\text{M}$  Fluo-4FF) in control solution and in DHPG (5  $\mu\text{M}$ ) in 4 cells. (C) Summary bar graph showing that increasing Fluo-4FF concentration to 500  $\mu\text{M}$  greatly reduced the DHPG effect on AP train-evoked  $\text{Ca}^{2+}$  transients (100  $\mu\text{M}$ :  $n = 5$  cells, 500  $\mu\text{M}$ :  $n = 4$  cells). \* $p < 0.05$  (unpaired t test).
